# Supplementary material for: Body composition measurements and risk of hematological malignancies: A population-based cohort study during 20 years of follow-up
Source: PLOS journal article supplement (doi:10.1371/journal.pone.0202651), 2018-08-23

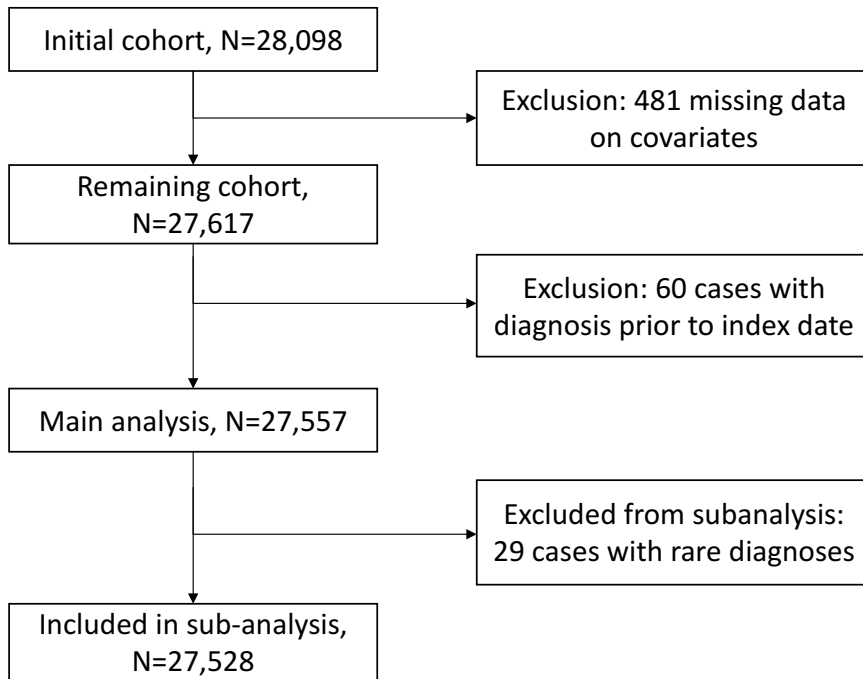

Supplement: S1 (10.1371/journal.pone.0202651.s001) [file journal.pone.0202651.s001]
